# Supplementary material
Source: PubMed Central journal article supplement (PMC3908783)
Supplement: NIHMS543599-supplement-01.pdf [file NIHMS543599-supplement-01.pdf]

1 **SUPPORTING INFORMATION**

2

3 **Figure S1: Distribution of Chrysene I/O ratios by season among non-smoker households.**

4

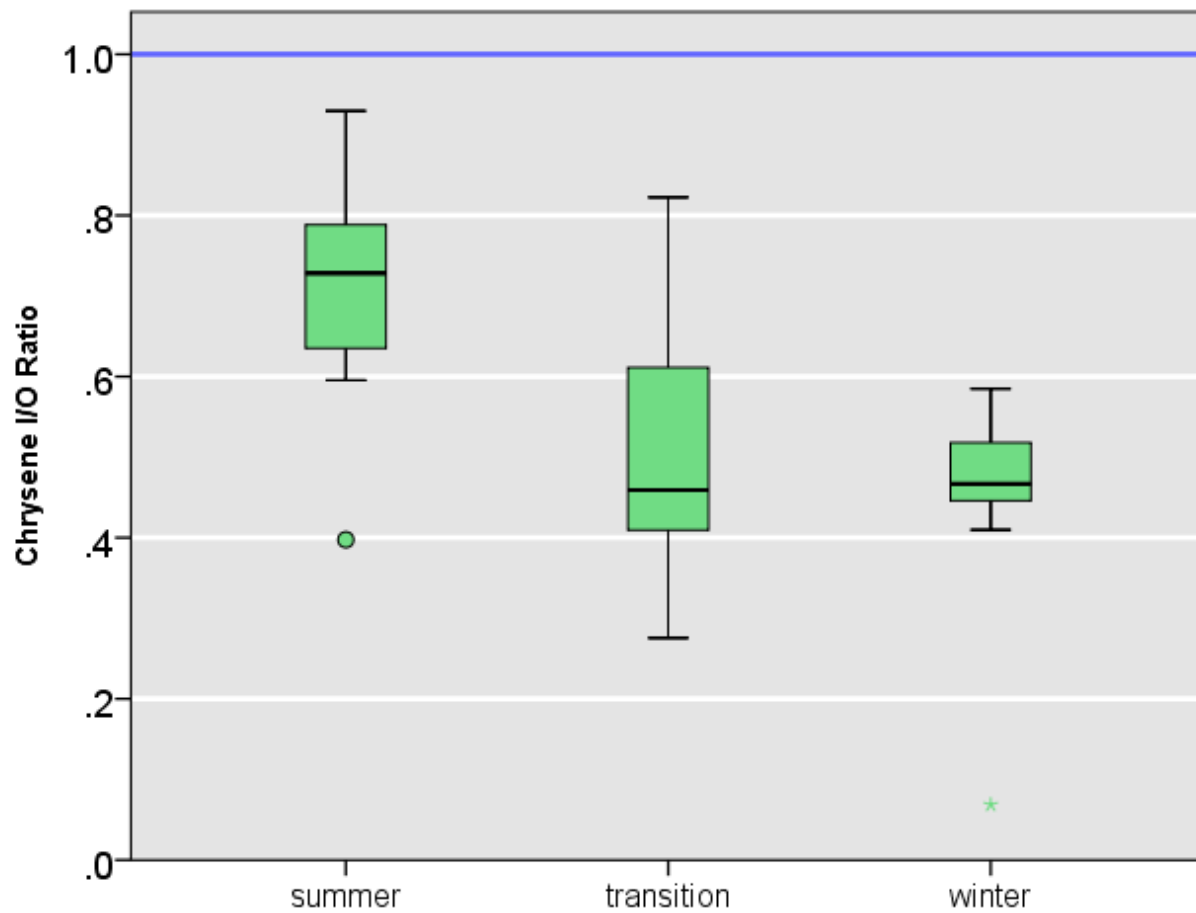

5

1 Figure S2: Distribution of BaP Personal/Outdoor Ratio, according to season and SHS intensity.

2

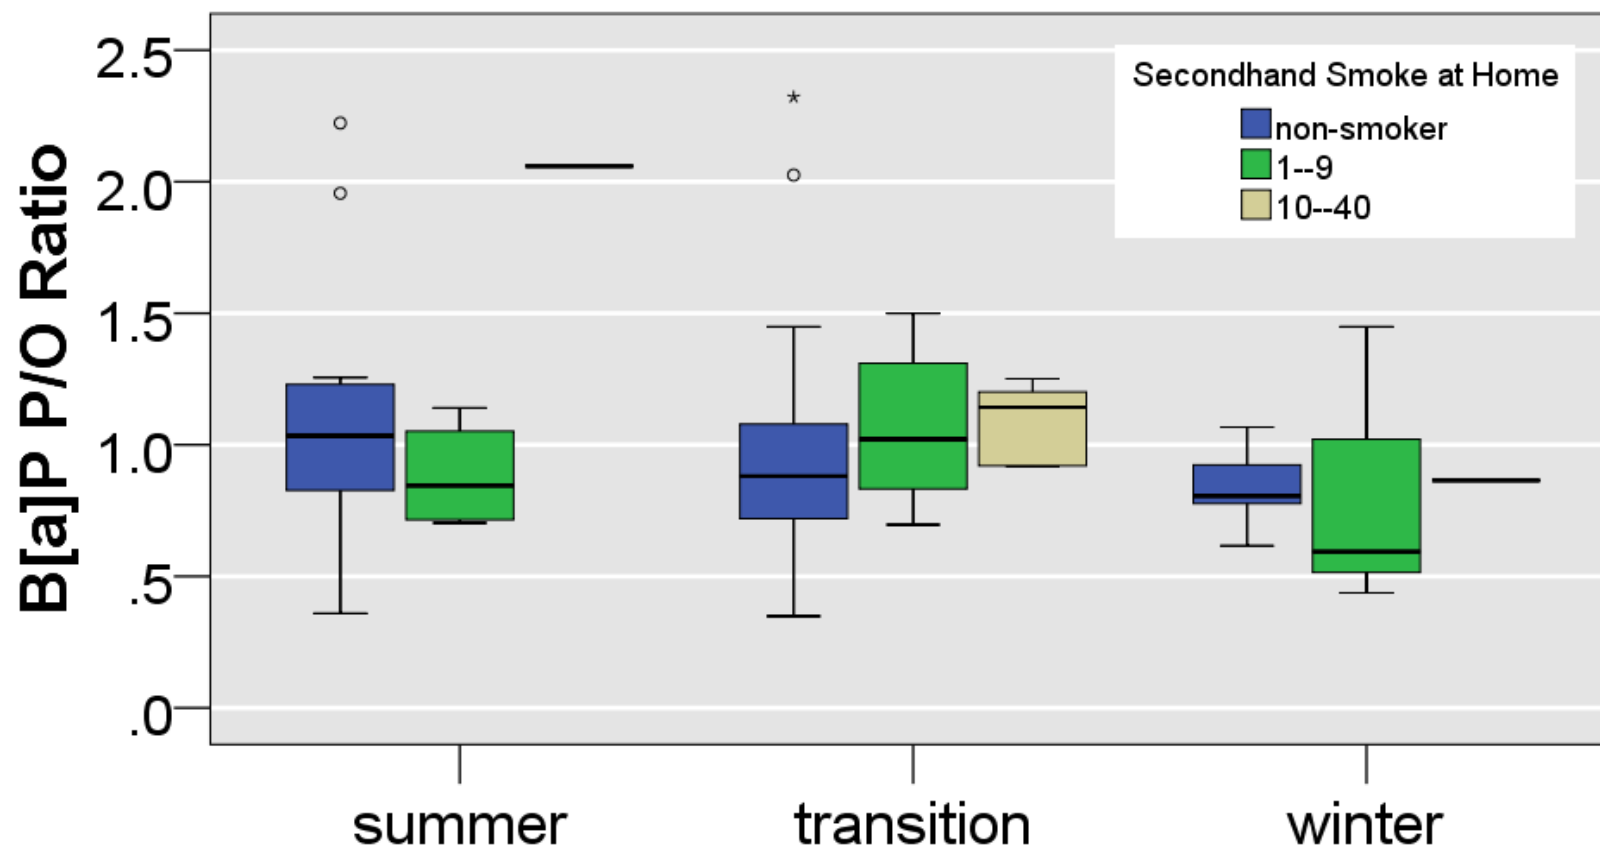

3

1 **Figure S3: Distribution of BaP Personal/Indoor Ratio, according to season and SHS intensity.**

2

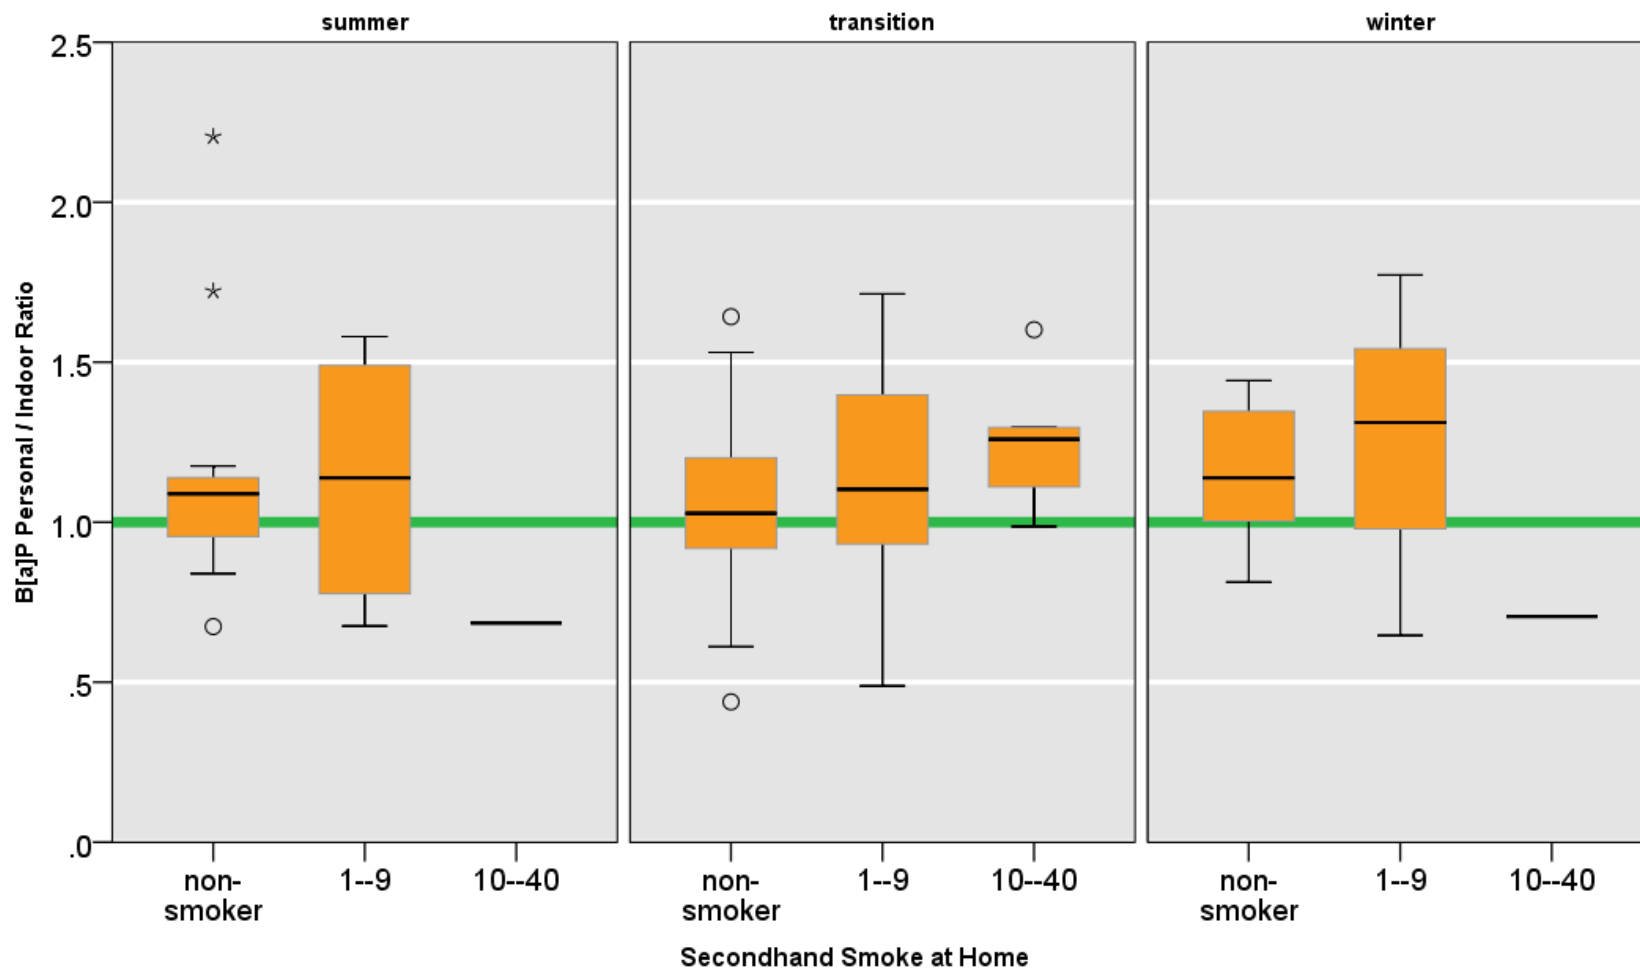

3

4

5

6

1 **Table S1: Distribution of Chrysene<sub>IN</sub>/Chrysene<sub>OUT</sub> According to Possible Indoor Sources.**

2

|                         | <i>N</i>          | <i>Mean</i> | <i>SD</i> | <i>Min</i> | <i>Median</i> | <i>Max</i> | <i>N</i>                  | <i>Mean</i> | <i>SD</i> | <i>Min</i> | <i>Median</i> | <i>Max</i> | <i>N</i>                    | <i>Mean</i> | <i>SD</i> | <i>Min</i> | <i>Median</i> | <i>Max</i> |      |
|-------------------------|-------------------|-------------|-----------|------------|---------------|------------|---------------------------|-------------|-----------|------------|---------------|------------|-----------------------------|-------------|-----------|------------|---------------|------------|------|
| <b>Candle burning</b>   | <u>No</u>         |             |           |            |               |            | <u>Yes</u>                |             |           |            |               |            |                             |             |           |            |               |            |      |
|                         | summer            | 10          | 0.74      | 0.12       | 0.59          | 0.73       | 0.93                      | 8           | 0.89      | 0.56       | 0.40          | 0.73       | 2.24                        |             |           |            |               |            |      |
|                         | transition        | 17          | 0.57      | 0.21       | 0.30          | 0.51       | 1.19                      | 24          | 0.51      | 0.15       | 0.28          | 0.46       | 0.81                        |             |           |            |               |            |      |
| winter                  | 5                 | 0.40        | 0.19      | 0.07       | 0.48          | 0.51       | 11                        | 0.50        | 0.16      | 0.30       | 0.45          | 0.91       |                             |             |           |            |               |            |      |
| <b>Incense burning</b>  | <u>No</u>         |             |           |            |               |            | <u>Yes</u>                |             |           |            |               |            |                             |             |           |            |               |            |      |
|                         | summer            | 13          | 0.85      | 0.44       | 0.40          | 0.77       | 2.24                      | 5           | 0.68      | 0.07       | 0.59          | 0.67       | 0.76                        |             |           |            |               |            |      |
|                         | transition        | 31          | 0.53      | 0.19       | 0.28          | 0.46       | 1.19                      | 10          | 0.56      | 0.12       | 0.45          | 0.55       | 0.79                        |             |           |            |               |            |      |
| winter                  | 14                | 0.48        | 0.17      | 0.07       | 0.48          | 0.91       | 2                         | 0.38        | 0.11      | 0.30       | 0.38          | 0.45       |                             |             |           |            |               |            |      |
| <b>Secondhand Smoke</b> | <u>Non-smoker</u> |             |           |            |               |            | <u>1—9 cigarettes/day</u> |             |           |            |               |            | <u>10—40 cigarettes/day</u> |             |           |            |               |            |      |
|                         | summer            | 13          | 0.72      | 0.14       | 0.40          | 0.73       | 0.93                      | 4           | 0.72      | 0.11       | 0.59          | 0.72       | 0.85                        | 1           | 2.24      |            | 2.24          | 2.24       | 2.24 |
|                         | transition        | 28          | 0.51      | 0.16       | 0.28          | 0.46       | 0.82                      | 8           | 0.60      | 0.25       | 0.40          | 0.54       | 1.19                        | 5           | 0.58      | 0.12       | 0.45          | 0.64       | 0.70 |
| winter                  | 12                | 0.45        | 0.13      | 0.07       | 0.47          | 0.58       | 3                         | 0.39        | 0.09      | 0.30       | 0.39          | 0.48       | 1                           | 0.91        |           | 0.91       | 0.91          | 0.91       |      |

3

1 **Table S2: personal/indoor ratios of nine PAHs**

|                              | B[a]A<br>P/I                 | B[b]F<br>P/I      | B[k]F<br>P/I | B[ghi]P<br>P/I | B[a]P<br>P/I | Chrysene<br>P/I | D[ah]A<br>P/I | IP<br>P/I | pyrene<br>P/I |      |    |
|------------------------------|------------------------------|-------------------|--------------|----------------|--------------|-----------------|---------------|-----------|---------------|------|----|
| <b>Summer</b>                | <u>small home</u>            |                   |              |                |              |                 |               |           |               |      |    |
|                              | N                            | 12                | 12           | 12             | 12           | 12              | 12            | 12        | 12            | 12   |    |
|                              | Mean                         | 1.10              | 1.03         | 1.00           | 1.13         | 1.15            | 1.11          | 0.98      | 1.08          | 2.58 |    |
|                              | SD                           | 0.17              | 0.21         | 0.16           | 0.30         | 0.42            | 0.29          | 0.14      | 0.16          | 4.00 |    |
|                              | 50 <sup>th</sup>             | 1.06              | 0.97         | 1.04           | 1.05         | 1.06            | 0.99          | 0.99      | 1.05          | 0.99 |    |
|                              | <u>larger home</u>           |                   |              |                |              |                 |               |           |               |      |    |
|                              | N                            | 1                 | 1            | 1              | 1            | 1               | 1             | 1         | 1             | 1    |    |
|                              | Mean                         | 1.21              | 1.02         | 1.01           | 0.92         | 1.18            | 1.20          | 0.81      | 0.91          | 1.04 |    |
|                              | SD                           | 1.21              | 1.02         | 1.01           | 0.92         | 1.18            | 1.20          | 0.81      | 0.91          | 1.04 |    |
|                              | 50 <sup>th</sup>             | 1.21              | 1.02         | 1.01           | 0.92         | 1.18            | 1.20          | 0.81      | 0.91          | 1.04 |    |
|                              | <b>Median P/I Difference</b> | -14%              | -5%          | 2%             | 12%          | -11%            | -21%          | 18%       | 14%           | -4%  |    |
|                              | <b>Transition</b>            | <u>small home</u> |              |                |              |                 |               |           |               |      |    |
|                              |                              | N                 | 25           | 25             | 25           | 25              | 25            | 25        | 25            | 25   | 25 |
| Mean                         |                              | 1.06              | 1.09         | 1.01           | 1.11         | 1.05            | 1.08          | 1.00      | 1.07          | 1.12 |    |
| SD                           |                              | 0.25              | 0.32         | 0.25           | 0.27         | 0.27            | 0.29          | 0.28      | 0.25          | 0.21 |    |
| 50 <sup>th</sup>             |                              | 1.06              | 1.05         | 0.99           | 1.10         | 1.03            | 1.10          | 1.00      | 1.06          | 1.14 |    |
| <u>larger home</u>           |                              |                   |              |                |              |                 |               |           |               |      |    |
| N                            |                              | 3                 | 3            | 3              | 3            | 3               | 3             | 3         | 3             | 3    |    |
| Mean                         |                              | 1.15              | 1.17         | 1.18           | 1.20         | 1.18            | 1.16          | 1.23      | 1.23          | 1.10 |    |
| SD                           |                              | 0.16              | 0.19         | 0.22           | 0.20         | 0.19            | 0.17          | 0.24      | 0.23          | 0.18 |    |
| 50 <sup>th</sup>             |                              | 1.20              | 1.25         | 1.20           | 1.31         | 1.23            | 1.22          | 1.35      | 1.28          | 1.20 |    |
| <b>Median P/I Difference</b> |                              | -13%              | -19%         | -22%           | -19%         | -20%            | -10%          | -35%      | -21%          | -5%  |    |
| <b>Winter</b>                |                              | <u>small home</u> |              |                |              |                 |               |           |               |      |    |
|                              |                              | N                 | 11           | 11             | 11           | 11              | 11            | 11        | 11            | 11   | 11 |
|                              | Mean                         | 1.67              | 1.74         | 1.75           | 1.76         | 1.88            | 1.70          | 1.97      | 1.76          | 1.64 |    |
|                              | SD                           | 1.83              | 1.91         | 1.82           | 2.03         | 2.52            | 1.81          | 2.68      | 2.08          | 1.71 |    |
|                              | 50 <sup>th</sup>             | 1.08              | 1.26         | 1.23           | 1.19         | 1.12            | 1.24          | 1.19      | 1.19          | 1.14 |    |
|                              | <u>larger home</u>           |                   |              |                |              |                 |               |           |               |      |    |
|                              | N                            | 1                 | 1            | 1              | 1            | 1               | 1             | 1         | 1             | 1    |    |
|                              | Mean                         | 1.41              | 1.15         | 1.18           | 1.08         | 1.16            | 1.34          | 1.15      | 1.09          | 1.27 |    |
|                              | 50 <sup>th</sup>             | 1.41              | 1.15         | 1.18           | 1.08         | 1.16            | 1.34          | 1.15      | 1.09          | 1.27 |    |
|                              | <b>Median P/I Difference</b> | -31%              | 8%           | 4%             | 9%           | -3%             | -8%           | 3%        | 9%            | -12% |    |

2  
3

1 **Table S3: Distribution of Chrysene<sub>IN</sub>/Chrysene<sub>OUT</sub> According to Common Cooking**  
 2 **Behavior.**

|                           |         |            | <b>N</b> | <b>Mean</b> | <b>SD</b> | <b>Min</b> | <b>Median</b> | <b>Max</b> | <b>P-value</b> |
|---------------------------|---------|------------|----------|-------------|-----------|------------|---------------|------------|----------------|
| <b>Use electric stove</b> | yes     | summer     | 3        | 0.77        | 0.11      | 0.67       | 0.76          | 0.88       | 0.54           |
|                           |         | transition | 6        | 0.50        | 0.12      | 0.38       | 0.49          | 0.64       |                |
|                           |         | winter     | 4        | 0.44        | 0.11      | 0.30       | 0.45          | 0.57       |                |
|                           | no      | summer     | 15       | 0.81        | 0.42      | 0.40       | 0.73          | 2.24       |                |
|                           |         | transition | 35       | 0.54        | 0.18      | 0.28       | 0.48          | 1.19       |                |
|                           |         | winter     | 12       | 0.48        | 0.19      | 0.07       | 0.48          | 0.91       |                |
|                           | Overall | summer     | 18       | 0.81        | 0.38      | 0.40       | 0.73          | 2.24       |                |
|                           |         | transition | 41       | 0.54        | 0.17      | 0.28       | 0.48          | 1.19       |                |
|                           |         | winter     | 16       | 0.47        | 0.17      | 0.07       | 0.47          | 0.91       |                |
| <b>Use electric oven</b>  | yes     | summer     | 9        | 0.89        | 0.53      | 0.40       | 0.73          | 2.24       | 0.55           |
|                           |         | transition | 17       | 0.52        | 0.14      | 0.30       | 0.46          | 0.82       |                |
|                           |         | winter     | 7        | 0.46        | 0.09      | 0.30       | 0.45          | 0.58       |                |
|                           | no      | summer     | 9        | 0.72        | 0.11      | 0.59       | 0.73          | 0.89       |                |
|                           |         | transition | 24       | 0.55        | 0.19      | 0.28       | 0.51          | 1.19       |                |
|                           |         | winter     | 9        | 0.48        | 0.22      | 0.07       | 0.48          | 0.91       |                |
|                           | Overall | summer     | 18       | 0.81        | 0.38      | 0.40       | 0.73          | 2.24       |                |
|                           |         | transition | 41       | 0.54        | 0.17      | 0.28       | 0.48          | 1.19       |                |
|                           |         | winter     | 16       | 0.47        | 0.17      | 0.07       | 0.47          | 0.91       |                |
| <b>Use gas stove</b>      | yes     | summer     | 15       | 0.81        | 0.42      | 0.40       | 0.73          | 2.24       | 0.54           |
|                           |         | transition | 35       | 0.54        | 0.18      | 0.28       | 0.48          | 1.19       |                |
|                           |         | winter     | 12       | 0.48        | 0.19      | 0.07       | 0.48          | 0.91       |                |
|                           | no      | summer     | 3        | 0.77        | 0.11      | 0.67       | 0.76          | 0.88       |                |
|                           |         | transition | 6        | 0.50        | 0.12      | 0.38       | 0.49          | 0.64       |                |
|                           |         | winter     | 4        | 0.44        | 0.11      | 0.30       | 0.45          | 0.57       |                |
|                           | Overall | summer     | 18       | 0.81        | 0.38      | 0.40       | 0.73          | 2.24       |                |
|                           |         | transition | 41       | 0.54        | 0.17      | 0.28       | 0.48          | 1.19       |                |
|                           |         | winter     | 16       | 0.47        | 0.17      | 0.07       | 0.47          | 0.91       |                |
| <b>Use gas oven</b>       | yes     | summer     | 6        | 0.74        | 0.11      | 0.60       | 0.75          | 0.89       | 0.72           |
|                           |         | transition | 13       | 0.52        | 0.24      | 0.28       | 0.46          | 1.19       |                |
|                           |         | winter     | 4        | 0.47        | 0.04      | 0.41       | 0.48          | 0.51       |                |
|                           | no      | summer     | 12       | 0.84        | 0.46      | 0.40       | 0.72          | 2.24       |                |
|                           |         | transition | 28       | 0.54        | 0.14      | 0.30       | 0.50          | 0.82       |                |
|                           |         | winter     | 12       | 0.47        | 0.20      | 0.07       | 0.45          | 0.91       |                |
|                           | Overall | summer     | 18       | 0.81        | 0.38      | 0.40       | 0.73          | 2.24       |                |
|                           |         | transition | 41       | 0.54        | 0.17      | 0.28       | 0.48          | 1.19       |                |

|                               |                      |            |      |      |      |      |      |      |      |
|-------------------------------|----------------------|------------|------|------|------|------|------|------|------|
|                               |                      | winter     | 16   | 0.47 | 0.17 | 0.07 | 0.47 | 0.91 |      |
| <b>Use wood stove</b>         | no                   | summer     | 18   | 0.81 | 0.38 | 0.40 | 0.73 | 2.24 |      |
|                               |                      | transition | 41   | 0.54 | 0.17 | 0.28 | 0.48 | 1.19 |      |
|                               |                      | winter     | 16   | 0.47 | 0.17 | 0.07 | 0.47 | 0.91 |      |
| <b>Use wood oven</b>          | no                   | summer     | 18   | 0.81 | 0.38 | 0.40 | 0.73 | 2.24 |      |
|                               |                      | transition | 41   | 0.54 | 0.17 | 0.28 | 0.48 | 1.19 |      |
|                               |                      | winter     | 16   | 0.47 | 0.17 | 0.07 | 0.47 | 0.91 |      |
| <b>Use coal burning stove</b> | no                   | summer     | 18   | 0.81 | 0.38 | 0.40 | 0.73 | 2.24 |      |
|                               |                      | transition | 41   | 0.54 | 0.17 | 0.28 | 0.48 | 1.19 |      |
|                               |                      | winter     | 16   | 0.47 | 0.17 | 0.07 | 0.47 | 0.91 |      |
| <b>Use coal burning oven</b>  | no                   | summer     | 18   | 0.81 | 0.38 | 0.40 | 0.73 | 2.24 |      |
|                               |                      | transition | 41   | 0.54 | 0.17 | 0.28 | 0.48 | 1.19 |      |
|                               |                      | winter     | 16   | 0.47 | 0.17 | 0.07 | 0.47 | 0.91 |      |
| <b>use charcoal grill</b>     | yes                  | summer     | 5    | 0.66 | 0.17 | 0.40 | 0.67 | 0.85 | 0.73 |
|                               |                      | transition | 5    | 0.49 | 0.07 | 0.42 | 0.46 | 0.60 |      |
|                               |                      | winter     | 3    | 0.52 | 0.06 | 0.48 | 0.49 | 0.58 |      |
|                               | no                   | summer     | 13   | 0.86 | 0.43 | 0.59 | 0.73 | 2.24 |      |
| transition                    |                      | 36         | 0.54 | 0.18 | 0.28 | 0.51 | 1.19 |      |      |
| winter                        |                      | 13         | 0.46 | 0.18 | 0.07 | 0.45 | 0.91 |      |      |
|                               | Overall              | summer     | 18   | 0.81 | 0.38 | 0.40 | 0.73 | 2.24 |      |
| transition                    |                      | 41         | 0.54 | 0.17 | 0.28 | 0.48 | 1.19 |      |      |
| winter                        |                      | 16         | 0.47 | 0.17 | 0.07 | 0.47 | 0.91 |      |      |
| <b>exhaust fan use</b>        | Always               | summer     | 7    | 0.72 | 0.18 | 0.40 | 0.73 | 0.93 | 0.50 |
|                               |                      | transition | 11   | 0.60 | 0.23 | 0.40 | 0.54 | 1.19 |      |
|                               |                      | winter     | 3    | 0.43 | 0.03 | 0.39 | 0.45 | 0.45 |      |
|                               | $\geq$ half the time | summer     | 2    | 0.68 | 0.07 | 0.64 | 0.68 | 0.73 |      |
| transition                    |                      | 1          | 0.82 |      | 0.82 | 0.82 | 0.82 |      |      |
|                               | Sometimes            | summer     | 1    | 2.24 |      | 2.24 | 2.24 | 2.24 |      |
| transition                    |                      | 4          | 0.49 | 0.13 | 0.38 | 0.47 | 0.65 |      |      |
| winter                        |                      | 3          | 0.41 | 0.10 | 0.30 | 0.45 | 0.48 |      |      |
|                               | Rarely or never      | summer     | 1    | 0.76 |      | 0.76 | 0.76 | 0.76 |      |
| transition                    |                      | 8          | 0.46 | 0.13 | 0.28 | 0.45 | 0.64 |      |      |
|                               | N/A                  | summer     | 7    | 0.73 | 0.12 | 0.59 | 0.70 | 0.89 |      |
| transition                    |                      | 17         | 0.52 | 0.14 | 0.30 | 0.47 | 0.81 |      |      |
| winter                        |                      | 10         | 0.50 | 0.21 | 0.07 | 0.50 | 0.91 |      |      |
|                               | Overall              | summer     | 18   | 0.81 | 0.38 | 0.40 | 0.73 | 2.24 |      |
| transition                    |                      | 41         | 0.54 | 0.17 | 0.28 | 0.48 | 1.19 |      |      |
| winter                        |                      | 16         | 0.47 | 0.17 | 0.07 | 0.47 | 0.91 |      |      |

|                                                     |                    |            |            |      |      |      |             |             |      |      |
|-----------------------------------------------------|--------------------|------------|------------|------|------|------|-------------|-------------|------|------|
| <b>Is the cooking oven separate from the stove?</b> | yes                | summer     | 1          | 0.85 |      | 0.85 | <i>0.85</i> | 0.85        | 0.98 |      |
|                                                     |                    | transition | 1          | 0.71 |      | 0.71 | <i>0.71</i> | 0.71        |      |      |
|                                                     |                    | winter     | 2          | 0.39 | 0.13 | 0.30 | <i>0.39</i> | 0.48        |      |      |
|                                                     | no                 | summer     | 17         | 0.80 | 0.39 | 0.40 | <i>0.73</i> | 2.24        |      |      |
|                                                     |                    | transition | 40         | 0.53 | 0.17 | 0.28 | <i>0.47</i> | 1.19        |      |      |
|                                                     |                    | winter     | 14         | 0.48 | 0.17 | 0.07 | <i>0.47</i> | 0.91        |      |      |
|                                                     | Overall            | summer     | 18         | 0.81 | 0.38 | 0.40 | <i>0.73</i> | 2.24        |      |      |
|                                                     |                    | transition | 41         | 0.54 | 0.17 | 0.28 | <i>0.48</i> | 1.19        |      |      |
|                                                     |                    | winter     | 16         | 0.47 | 0.17 | 0.07 | <i>0.47</i> | 0.91        |      |      |
| <b>Would you say you use the exhaust fan ...</b>    | Sometimes          | winter     | 1          | 0.48 |      | 0.48 | <i>0.48</i> | 0.48        | 0.69 |      |
|                                                     | NA                 | summer     | 18         | 0.81 | 0.38 | 0.40 | <i>0.73</i> | 2.24        |      |      |
|                                                     |                    | transition | 41         | 0.54 | 0.17 | 0.28 | <i>0.48</i> | 1.19        |      |      |
|                                                     |                    | winter     | 15         | 0.47 | 0.17 | 0.07 | <i>0.45</i> | 0.91        |      |      |
|                                                     | Overall            | summer     | 18         | 0.81 | 0.38 | 0.40 | <i>0.73</i> | 2.24        |      |      |
|                                                     |                    | transition | 41         | 0.54 | 0.17 | 0.28 | <i>0.48</i> | 1.19        |      |      |
|                                                     |                    | winter     | 16         | 0.47 | 0.17 | 0.07 | <i>0.47</i> | 0.91        |      |      |
|                                                     | <b>Burn Candle</b> | yes        | summer     | 8    | 0.89 | 0.56 | 0.40        | <i>0.73</i> | 2.24 | 0.83 |
|                                                     |                    |            | transition | 24   | 0.51 | 0.15 | 0.28        | <i>0.46</i> | 0.81 |      |
| winter                                              |                    |            | 11         | 0.50 | 0.16 | 0.30 | <i>0.45</i> | 0.91        |      |      |
| no                                                  |                    | summer     | 10         | 0.74 | 0.12 | 0.59 | <i>0.73</i> | 0.93        |      |      |
|                                                     |                    | transition | 17         | 0.57 | 0.21 | 0.30 | <i>0.51</i> | 1.19        |      |      |
|                                                     |                    | winter     | 5          | 0.40 | 0.19 | 0.07 | <i>0.48</i> | 0.51        |      |      |
| Overall                                             |                    | summer     | 18         | 0.81 | 0.38 | 0.40 | <i>0.73</i> | 2.24        |      |      |
|                                                     |                    | transition | 41         | 0.54 | 0.17 | 0.28 | <i>0.48</i> | 1.19        |      |      |
|                                                     |                    | winter     | 16         | 0.47 | 0.17 | 0.07 | <i>0.47</i> | 0.91        |      |      |
| <b>Burn incense</b>                                 | yes                | summer     | 5          | 0.68 | 0.07 | 0.59 | <i>0.67</i> | 0.76        | 0.85 |      |
|                                                     |                    | transition | 10         | 0.56 | 0.12 | 0.45 | <i>0.55</i> | 0.79        |      |      |
|                                                     |                    | winter     | 2          | 0.38 | 0.11 | 0.30 | <i>0.38</i> | 0.45        |      |      |
|                                                     | no                 | summer     | 13         | 0.85 | 0.44 | 0.40 | <i>0.77</i> | 2.24        |      |      |
|                                                     |                    | transition | 31         | 0.53 | 0.19 | 0.28 | <i>0.46</i> | 1.19        |      |      |
|                                                     |                    | winter     | 14         | 0.48 | 0.17 | 0.07 | <i>0.48</i> | 0.91        |      |      |
|                                                     | Overall            | summer     | 18         | 0.81 | 0.38 | 0.40 | <i>0.73</i> | 2.24        |      |      |
|                                                     |                    | transition | 41         | 0.54 | 0.17 | 0.28 | <i>0.48</i> | 1.19        |      |      |
|                                                     |                    | winter     | 16         | 0.47 | 0.17 | 0.07 | <i>0.47</i> | 0.91        |      |      |
